# Supplementary material for: Pulsation-limited oxygen diffusion in the tumour microenvironment
Source: PubMed Central journal article supplement (PMC5206636; doi:10.1038/srep39762), 2017-01-03
Supplement: srep39762-s1.pdf [file srep39762-s1.pdf]

# Supporting Information for “Pulsation-limited oxygen diffusion in the tumour microenvironment.”

Edoardo Milotti\* and Sabrina Stella

*Department of Physics, University of Trieste, Via Valerio 2, I-34127 Trieste, Italy*

Roberto Chignola

*Department of Biotechnology, University of Verona,  
Strada Le Grazie 15, CV1 I-37134, Verona, Italy*

## I. REACTION-DIFFUSION IN A HALF-SPACE

The diffusion equation with a simple linear reaction term writes:

$$\frac{\partial \Phi}{\partial t} = D \nabla^2 \Phi - \gamma \Phi. \quad (\text{S1})$$

In a planar geometry,  $\phi_n$  depends on a single space variable  $x$  and we take the boundary condition  $\Phi(x = 0, t) = \sum_{n=-\infty}^{\infty} \phi_n(0) e^{in\omega t} = \sum_{n=-\infty}^{\infty} c_n e^{in\omega t}$ . In this case, equation (S1) takes on the simpler form

$$\frac{\partial \Phi}{\partial t} = D \frac{\partial^2 \Phi}{\partial x^2} - \gamma \Phi. \quad (\text{S2})$$

We find solutions of equation (S2) using the complex Fourier expansion of the concentration in the time domain

$$\Phi(x, t) = \sum_{n=-\infty}^{\infty} \phi_n(x) e^{in\omega t}, \quad (\text{S3})$$

where the usual relation  $\phi_n(x) = \phi_{-n}^*(x)$  between pairs of Fourier coefficients holds, since the concentration is a real function. By substitution we find that the space-dependent Fourier coefficients satisfy the equation

$$\frac{d^2 \phi_n}{dx^2} = \frac{\gamma + i\omega_n}{D} \phi_n(x) \quad (\text{S4})$$

in the half-space  $x > 0$ , with  $\omega_n = n\omega$ . Therefore, when we let  $\phi_n(x) = c_n e^{ik_n x}$  – so that  $\Phi(x, t) = c_n e^{i\omega_n t + ik_n x}$  – we find

$$k^2 = -\frac{\gamma + i\omega_n}{D} = \frac{1}{D} \sqrt{\omega_n^2 + \gamma^2} e^{i \arctan \omega_n / \gamma + i\pi}, \quad (\text{S5})$$

and

$$k = \pm \left( \frac{\omega_n^2 + \gamma^2}{D^2} \right)^{1/4} \left[ \sin \left( \frac{1}{2} \arctan \frac{\omega_n}{\gamma} \right) + i \cos \left( \frac{1}{2} \arctan \frac{\omega_n}{\gamma} \right) \right]. \quad (\text{S6})$$

Finally, using the boundary conditions we obtain the solution

$$\Phi(x, t) = c_n \exp \left\{ i \left[ \omega_n t + \left( \frac{\omega_n^2 + \gamma^2}{D^2} \right)^{1/4} \sin \left( \frac{1}{2} \arctan \frac{\omega_n}{\gamma} \right) x \right] - \left( \frac{\omega_n^2 + \gamma^2}{D^2} \right)^{1/4} \cos \left( \frac{1}{2} \arctan \frac{\omega_n}{\gamma} \right) x \right\}, \quad (\text{S7})$$

and from the trigonometric identity

$$\cos \frac{\arctan y}{2} = \sqrt{\frac{\cos(\arctan y) + 1}{2}} = \sqrt{\frac{1 + \sqrt{1 + y^2}}{2\sqrt{1 + y^2}}}, \quad (\text{S8})$$

we find the decay length  $\ell_n$

$$\ell_n = \sqrt{\frac{2D}{\gamma + \sqrt{(\omega_n^2 + \gamma^2)}}} = \ell_0 \sqrt{\frac{2}{1 + \sqrt{1 + \omega_n^2/\gamma^2}}}. \quad (\text{S9})$$

---

\* milotti@units.it

## II. CYLINDRICAL SYMMETRY

Assuming cylindrical symmetry, the reaction-diffusion equation in cylindrical coordinates is

$$\frac{\partial \Phi}{\partial t} = D \frac{1}{r} \frac{\partial}{\partial r} \left( r \frac{\partial \Phi}{\partial r} \right) - \gamma \Phi. \quad (\text{S10})$$

We separate again the spatial and the time variables, taking candidate solutions

$$\Phi(\mathbf{r}, t) = \Phi(r, t) = \sum_{n=-\infty}^{\infty} \phi_n(r) e^{i n \omega t}, \quad (\text{S11})$$

that lead to the equations for the Fourier coefficients

$$r \frac{\partial}{\partial r} \left( r \frac{\partial \phi_n}{\partial r} \right) - \left( \frac{\gamma + i \omega_n}{D} \right) r^2 \phi_n = 0. \quad (\text{S12})$$

The boundary conditions are defined by the inner surface of the blood vessel ( $r = R$ , where  $R$  is the radius of the blood vessel), where we set  $\Phi(r = R, t) = \sum_{n=-\infty}^{\infty} \phi_n(0) e^{i n \omega t} = \sum_{n=-\infty}^{\infty} c_n e^{i n \omega t}$ , and by  $\lim_{r \rightarrow \infty} \Phi(r, \theta, z, t) < \infty$ . Equations (S12) are modified Bessel equations, and the solutions that satisfy the boundary conditions are the modified Bessel functions of the second kind  $K_0 \left( \sqrt{(\gamma + i \omega_n)/D} r \right)$ . The complex argument of the Bessel function can be written as follows

$$s = r \sqrt{\frac{i \omega_n + \gamma}{D}} = r \frac{(\omega_n^2 + \gamma^2)^{1/4}}{\sqrt{D}} \exp \left[ \frac{i}{2} \arctan \left( \frac{\omega_n}{\gamma} \right) \right], \quad (\text{S13})$$

and since both  $\omega_n$  and  $\gamma$  are nonnegative, so that  $0 \leq \arctan(\omega_n/\gamma) \leq \pi/2$  and  $|\arg(s)| \leq \pi/4$ , we can use the following asymptotic expansion for  $K_0(z)$  (see, e.g., eq. (9.7.2) in [1])

$$K_0(s) \sim \sqrt{\frac{\pi}{2z}} e^{-s}, \quad (\text{S14})$$

and we find that the asymptotic behavior of the solution is

$$|\Phi(r, \theta, z, t)| \sim \sqrt{\frac{\pi \sqrt{D}}{2r(\omega_n^2 + \gamma^2)^{1/4}}} \cos \left[ \omega_n t + \left( \frac{\omega_n^2 + \gamma^2}{D^2} \right)^{1/4} \sin \left( \frac{1}{2} \arctan \frac{\omega_n}{\gamma} \right) r \right] \\ \times \exp \left[ - \left( \frac{\omega_n^2 + \gamma^2}{D^2} \right)^{1/4} \cos \left( \frac{1}{2} \arctan \frac{\omega_n}{\gamma} \right) r \right]. \quad (\text{S15})$$

The oscillatory and the exponential parts are just like those of equation (S7), however the asymptotic expansion (S15) includes a factor  $r^{-1/2}$  and it has a faster-than-exponential decay. Again, as in the case of equation (S7), the longest characteristic length corresponds to the stationary case ( $\omega_0 = 0$ ), and taking the boundary condition  $\Phi(r = R, \theta, z, t) = \Phi_0$  the solution is

$$\Phi(r, \theta, z, t) = \varphi(r) = \Phi_0 \frac{K_0 \left( \sqrt{\frac{\gamma}{D}} r \right)}{K_0 \left( \sqrt{\frac{\gamma}{D}} R \right)}. \quad (\text{S16})$$

## III. REACTION-DIFFUSION AROUND TUMOUR BLOOD VESSELS: THE CASE OF TUMOUR CORDS

Here we develop a method to solve the reaction-diffusion equation in a complex setting where the oxygen absorption rate is position-dependent, and we start with the simpler case of reaction-diffusion in a half space and without explicit time dependence.

## A. Stationary case

### 1. Reaction-diffusion in a half-space

In the time-independent case the reaction-diffusion equation in a half-space with variable consumption rate takes on the form

$$D \frac{\partial^2 \Phi}{\partial x^2} - \gamma(x) \Phi(x) = 0, \quad (\text{S17})$$

with  $x \geq 0$ , with the boundary condition  $\Phi(0) = \Phi_0$ , and with

$$\gamma(x) \approx \gamma_0 + \gamma_c \exp(-x/\lambda_c). \quad (\text{S18})$$

In general equation (S17) does not have a closed-form solution, however we can still find a solution as follows. We divide the  $x$  range in thin layers with thickness  $\Delta x$  so that we can use the fixed- $\gamma$ , time-independent solution of equation (S2) in each layer, and we obtain

$$\Phi(x + \Delta x) \approx \exp \left[ -\sqrt{\frac{\gamma(x)}{D}} \Delta x \right] \Phi(x), \quad (\text{S19})$$

and therefore by iteration we get

$$\begin{aligned} \Phi(x + n\Delta x) &\approx \\ &\approx \exp \left[ -\sqrt{\frac{\gamma(x + (n-1)\Delta x)}{D}} \Delta x \right] \dots \exp \left[ -\sqrt{\frac{\gamma(x + \Delta x)}{D}} \Delta x \right] \exp \left[ -\sqrt{\frac{\gamma(x)}{D}} \Delta x \right] \\ &\approx \exp \left[ -\sum_{k=0}^{n-1} \sqrt{\frac{\gamma(x + k\Delta x)}{D}} \Delta x \right] \Phi(x). \end{aligned} \quad (\text{S20})$$

Then, taking the limit  $\Delta x \rightarrow 0$ ,  $n\Delta x \rightarrow z$ , we find

$$\Phi(x + y) = \exp \left( -\int_0^y \sqrt{\frac{\gamma(x+z)}{D}} dz \right) \Phi(x), \quad (\text{S21})$$

or also

$$\Phi(x) = \exp \left( -\int_0^x \sqrt{\frac{\gamma(z)}{D}} dz \right) \Phi_0. \quad (\text{S22})$$

As a curiosity we note that with the assumed behavior  $\gamma(x) = \gamma_0 + \gamma_c \exp(-x/\lambda_c)$  – an exponentially decreasing  $\gamma$  with largest value  $\gamma_0 + \gamma_c$  on the interface plane at  $x = 0$  – it is possible to integrate the exponent in (S22), since a primitive function exist

$$\int \sqrt{a + be^{cx}} dx = \frac{2}{c} \left[ \sqrt{a + be^{cx}} - \sqrt{a} \operatorname{arctanh} \left( \frac{\sqrt{a + be^{cx}}}{\sqrt{a}} \right) \right], \quad (\text{S23})$$

so that finally we find the exact solution

$$\Phi(x) = \exp[-S(x)] \Phi_0, \quad (\text{S24})$$

with

$$\begin{aligned} S(x) &= \int_0^x \sqrt{\frac{1}{D} [\gamma + \gamma_c \exp(-z/\lambda_c)]} dz \\ &= -2\lambda_c \left( \sqrt{\frac{\gamma + \gamma_c \exp(-x/\lambda_c)}{D}} - \sqrt{\frac{\gamma}{D}} \operatorname{arctanh} \sqrt{1 + \frac{\gamma_c}{\gamma} \exp(-x/\lambda_c)} \right) \\ &\quad + 2\lambda_c \left( \sqrt{\frac{\gamma + \gamma_c}{D}} - \sqrt{\frac{\gamma}{D}} \operatorname{arctanh} \sqrt{1 + \frac{\gamma_c}{\gamma}} \right). \end{aligned} \quad (\text{S25})$$

## 2. Cylindrical symmetry

We find that the previous derivation can be adapted to the time-independent reaction-diffusion equation in cylindrical coordinates

$$\frac{1}{r} \frac{\partial}{\partial r} \left( r \frac{\partial \Phi}{\partial r} \right) - \gamma(r) \Phi(r) = 0, \quad (\text{S26})$$

with

$$\gamma(r) \approx \gamma_0 + \gamma_c \exp[-(r - R)/\lambda_c]. \quad (\text{S27})$$

We proceed as above, bearing in mind that in each thin cylindrical shell the local solution is proportional to  $K_0(\sqrt{\gamma(r)/D} r)$ , with  $\gamma(r)$  nearly constant, and we find

$$\Phi(r + \Delta r) \approx \Phi(r) \frac{K_0[\sqrt{\gamma(r)/D} (r + \Delta r)]}{K_0[\sqrt{\gamma(r)/D} r]}. \quad (\text{S28})$$

Iterating this local step we find

$$\Phi(r + 2\Delta r) \approx \Phi(r) \frac{K_0[\sqrt{\gamma(r)/D} (r + 2\Delta r)]}{K_0[\sqrt{\gamma(r)/D} (r + \Delta r)]} \frac{K_0[\sqrt{\gamma(r)/D} (r + \Delta r)]}{K_0[\sqrt{\gamma(r)/D} r]}, \quad (\text{S29})$$

and finally

$$\Phi(r + n\Delta r) \approx \Phi(r) \frac{\prod_{k=0}^{n-1} K_0[\sqrt{\gamma(r)/D} (r + (k+1)\Delta r)]}{\prod_{k=0}^{n-1} K_0[\sqrt{\gamma(r)/D} (r + k\Delta r)]}. \quad (\text{S30})$$

Eq. (S30) can also be written in the form

$$\Phi(r + n\Delta r) \approx \Phi(r) \prod_{k=0}^{n-1} \left\{ 1 + \sqrt{\frac{\gamma(r + k\Delta r)}{D}} \frac{K'_0[\sqrt{\gamma(r + k\Delta r)/D} (r + k\Delta r)]}{K_0[\sqrt{\gamma(r + k\Delta r)/D} (r + k\Delta r)]} \Delta r \right\}, \quad (\text{S31})$$

after expansion of the numerator for small  $\Delta r$ . It is also possible to proceed in an equivalent way taking the logarithm of equation (S30) first, so that

$$\begin{aligned} \ln \Phi(r + n\Delta r) &\approx \ln \Phi(r) + \sum_{k=0}^{n-1} \ln K_0[\sqrt{\gamma(r + k\Delta r)/D} (r + (k+1)\Delta r)] \\ &\quad - \sum_{k=0}^{n-1} \ln K_0[\sqrt{\gamma(r + k\Delta r)/D} (r + k\Delta r)] \end{aligned} \quad (\text{S32})$$

$$\approx \ln \Phi(r) + \sum_{k=0}^{n-1} \sqrt{\frac{\gamma(r + k\Delta r)}{D}} \frac{K'_0[\sqrt{\gamma(r + k\Delta r)/D} (r + k\Delta r)]}{K_0[\sqrt{\gamma(r + k\Delta r)/D} (r + k\Delta r)]} \Delta r, \quad (\text{S33})$$

and therefore

$$\ln \Phi(r + r') = \ln \Phi(r) + \int_0^{r'} \sqrt{\frac{\gamma(r + r'')}{D}} \frac{K'_0[\sqrt{\gamma(r + r'')/D} (r + r'')]}{K_0[\sqrt{\gamma(r + r'')/D} (r + r'')]} dr'', \quad (\text{S34})$$

or equivalently

$$\ln \Phi(r) = \ln \Phi(R) + \int_R^r \sqrt{\frac{\gamma(r')}{D}} \frac{K'_0[\sqrt{\gamma(r')/D} r']}{K_0[\sqrt{\gamma(r')/D} r']} dr' = \ln \Phi(R) + \int_R^r d \ln K_0[\sqrt{\gamma(r')/D} r']. \quad (\text{S35})$$

Notice that if  $\gamma(r) = \gamma$ , we find

$$\ln \Phi(r) = \ln \Phi(R) + \int_R^r d \ln K_0 \left[ \sqrt{\gamma/D} r' \right] = \ln \varphi(R) + \ln \frac{K_0 \left[ \sqrt{\gamma/D} r \right]}{K_0 \left[ \sqrt{\gamma/D} R \right]}, \quad (\text{S36})$$

i.e., we recover

$$\Phi(r) = \Phi(R) \frac{K_0 \left[ \sqrt{\gamma/D} r \right]}{K_0 \left[ \sqrt{\gamma/D} R \right]}, \quad (\text{S37})$$

which is the original solution with constant  $\gamma$ .

Using the integral representation (see, e.g., eq. (9.6.24) in [1])

$$K_\nu(z) = \int_0^\infty e^{-z \cosh t} \cosh(\nu t) dt, \quad (\text{S38})$$

it is easy to see that  $K'_0(z) = -K_1(z)$  (eq. (9.6.27) in [1]), and therefore we can also rewrite the integral (S35) as follows

$$\ln \Phi(r) = \ln \Phi(R) - \int_R^r \sqrt{\frac{\gamma(r')}{D}} \frac{K_1 \left[ \sqrt{\gamma(r')/D} r' \right]}{K_0 \left[ \sqrt{\gamma(r')/D} r' \right]} dr'. \quad (\text{S39})$$

### B. Time-dependent case with periodic oxygen fluctuations

When we consider the time-dependent case eq. (S26) is replaced by the equation

$$\frac{1}{r} \frac{\partial}{\partial r} \left( r \frac{\partial \phi_n}{\partial r} \right) - \left( \frac{\gamma(r) + i\omega_n}{D} \right) \phi_n = 0, \quad (\text{S40})$$

with the boundary conditions  $\Phi(r = R, t) = \sum_{n=-\infty}^{\infty} \phi_n(0) e^{in\omega t} = \sum_{n=-\infty}^{\infty} c_n e^{in\omega t}$ , and  $\lim_{r \rightarrow \infty} \Phi(r, \theta, z, t) < \infty$ . This is formally the same as equation (S26), with a complex consumption rate  $\gamma(r) \rightarrow \gamma(r) + i\omega_n$ , and the formal solution parallels that found in section III A 2 above:

$$\begin{aligned} \ln \phi_n(r) &= \ln \phi_n(R) + \int_R^r \sqrt{\frac{i\omega_n + \gamma(r')}{D}} \frac{K'_0 \left[ \sqrt{i\omega_n + \gamma(r')/D} r' \right]}{K_0 \left[ \sqrt{i\omega_n + \gamma(r')/D} r' \right]} dr' \\ &= \ln \phi_n(R) - \int_R^r \sqrt{\frac{i\omega_n + \gamma(r')}{D}} \frac{K_1 \left[ \sqrt{i\omega_n + \gamma(r')/D} r' \right]}{K_0 \left[ \sqrt{i\omega_n + \gamma(r')/D} r' \right]} dr'. \end{aligned} \quad (\text{S41})$$

The calculation of this expression requires an evaluation of the Bessel functions of the second kind with complex argument prior to the integration step [2].

---

[1] Abramowitz, M. & Stegun, I. A. *Handbook of Mathematical Functions* (Dover New York, 1972).

[2] Mechel, F. Calculation of the Modified Bessel Functions of the Second Kind with Complex Argument. *Mathematics of Computation* **20**, 407–412 (1966).
